# Supplementary material
Source: publisher figshare collection journal article supplement (https://future-science-group.figshare.com/articles/dataset/_/21062551)
Supplement: Supplementary file 1 [file 1]

| **Supplemental Table 1. T-test results comparing differences mean count values in the differentially expressed genes between participants with any chorioamnionitis or inflammation (n= 173), and participants without any chorioamnionitis or inflammation (n= 189).** Significance defined at p<0.05. Data does not include missing values. | |
| --- | --- |
| **mRNA** | **P-value** |
| *TMEM43* | 0.5464 |
| *CDC16* | 0.4635 |
| *STXBP3* | 0.294 |
| *FAM135A* | 0.5726 |
| *GDPD5* | 0.5659 |
| *HIPK3* | 0.7404 |
| *ITPRIPL2* | 0.3985 |
| *KAT2B* | 0.2541 |
| *RAB5A* | 0.6865 |
| *SRPK2* | 0.717 |
| *TMEM212* | 0.0771 |
| *TVP23B* | 0.3081 |
| *GBP3* | 0.1952 |
| *MLLT10* | 0.6293 |
| *PYGL* | 0.4333 |
| *STX7* | 0.5688 |
| *FABP4* | 0.188 |
| *GNAI1* | 0.2676 |
| *ARFGEF2* | 0.1476 |
| *FN1* | 0.321 |
| *ITGB2* | 0.9127 |
| *NCBP2-AS2* | 0.3832 |
| *RTF2* | 0.7915 |
| *SCAF11* | 0.6259 |
| *UCHL3* | 0.8489 |
| *ZNF280D* | 0.5678 |
| *GLDN* | 0.6504 |
| *SPECC1L* | 0.8958 |
| *HBA2* | 0.6934 |
| *ARHGAP29* | 0.613 |
| *ID2* | 0.5985 |
| *CBX5* | 0.8115 |
| *STAM* | 0.7131 |
| *RC3H1* | 0.662 |
| *RBM47* | 0.3837 |
| *HBB* | 0.0745 |
| *BCL2L2-PABPN1* | 0.3572 |
| *HBG2* | 0.3849 |
| *BANF1* | 0.9353 |
| *BRD8* | 0.0783 |
| *CPB1* | 0.5581 |
| *IQGAP1* | 0.8111 |
| *LOXL1* | 0.9518 |
| *SETDB1* | 0.9089 |
| *SAFB2* | 0.5565 |
| *SDCBP* | 0.1206 |
| *SERPINB9* | 0.435 |
| *TMEM192* | 0.1814 |

| **Supplemental Table 2. 48 mRNAs identified with significant differential expression associated with neurodevelopment.** Covariates included: maternal age, birthweight, infant sex, health insurance status. Significance defined as BH adjusted p values <0.1 and fold change greater than absolute value of log2(1.5). BH (Benjamini-Hochberg) | | | | | | | | | |
| --- | --- | --- | --- | --- | --- | --- | --- | --- | --- |
| **Gene** | **Full Gene Name** | **Fold Change (log2)** | **Base Mean** | **P-value** | **BH-adjusted p-value** | **Chromosome** | **Genebank Gene ID** | **Function** | **Reference** |
| **Increased expression in cases of cognitive impairment** | | | | | | |  |  |  |
| *TMEM43* | Transmembrane Protein 43 | 0.958 | 3.466 | 0.000 | 0.001 | 3 | 79188 | Apoptosis | 33070193 |
| *CDC16* | Cell Division Cycle 16 | 0.730 | 2.764 | 0.000 | 0.026 | 13 | 8881 | Cell-cycle regulation | 15474510 |
| *STXBP3* | Syntaxin Binding Protein 3 | 0.670 | 3.479 | 0.000 | 0.026 | 1 | 6814 | Insulin-dependent movement of adipocytes | 21897333 |
| *FAM135A* | Family With Sequence Similarity 135 Member A | 0.586 | 5.691 | 0.000 | 0.044 | 6 | 57579 | Relatively unknown function | 25991709 |
| *GDPD5* | Glycerophosphodiester Phosphodiesterase Domain Containing 5 | 0.603 | 17.215 | 0.000 | 0.044 | 11 | 81544 | Apoptosis | 27356959 |
| *HIPK3* | Homeodomain Interacting Protein Kinase 3 | 0.615 | 4.777 | 0.000 | 0.044 | 11 | 10114 | Transcription regulation, apoptosis, steroidogenic gene expression | 17210646, 14766760 |
| *ITPRIPL2* | Inositol 1,4,5-Trisphosphate Receptor Interacting Protein Like 2 | 0.532 | 20.973 | 0.000 | 0.044 | 16 | 162073 | May be associated with BPALC, little is known about the function | 21876473 |
| *KAT2B* | Lysine Acetyltransferase 2B | 0.866 | 1.986 | 0.000 | 0.044 | 3 | 8850 | Promote transcriptional activation, inhibits cell0cycle progreession of the adenoviral encoprotein E1A | 8945521, 8684459 |
| *RAB5A* | RAB5A, Member RAS Oncogene Family | 0.431 | 12.031 | 0.000 | 0.044 | 3 | 5868 | Cell signaling, inflammation, and apoptosis | 32747601 |
| *SRPK2* | SRSF Protein Kinase 2 | 0.458 | 7.048 | 0.000 | 0.044 | 7 | 6733 | Cell proliferation and apoptosis | 21056976 |
| *TMEM212* | Transmembrane Protein 212 | 0.355 | 18.905 | 0.000 | 0.044 | 3 | 389177 | innate architecture of face processing | 22828495 |
| *TVP23B* | Trans-Golgi Network Vesicle Protein 23 Homolog B | 0.637 | 6.346 | 0.000 | 0.044 | 17 | 51030 | Enables protein binding | 24309898 |
| *GBP3* | Guanylate Binding Protein 3 | 0.755 | 2.403 | 0.000 | 0.046 | 1 | 2635 | Cytokine signaling, innate immune system | 29203515 |
| *MLLT10* | MLLT10 Histone Lysine Methyltransferase DOT1L Cofactor | 0.402 | 12.455 | 0.000 | 0.076 | 10 | 8028 | Common gene mutated in cases of leukemia | 30760869, 23673860 |
| *PYGL* | Glycogen Phosphorylase L | 0.478 | 5.988 | 0.000 | 0.076 | 14 | 5836 | promotes oxidative-stress induced inflammation. Vitamin B6 vitamer | 32126244 |
| *STX7* | Syntaxin 7 | 0.492 | 7.509 | 0.000 | 0.076 | 6 | 8417 | role in vesicle trafficking between Golgi complex and lysosomes, involved in phagocytosis | 9358037, 20170677 |
| *FABP4* | Fatty Acid Binding Protein 4 | 1.058 | 2.255 | 0.000 | 0.076 | 8 | 2167 | binds and transports fatty acids | 15015141, 20156355 |
| *GNAI1* | G Protein Subunit Alpha I1 | 0.640 | 2.539 | 0.000 | 0.076 | 7 | 2770 | Inflammation, immune response, cell proliferation, apoptosis | 33658614 |
| *ARFGEF2* | ADP Ribosylation Factor Guanine Nucleotide Exchange Factor 2 | 0.415 | 10.429 | 0.001 | 0.097 | 20 | 10564 | associated with neurocognitive impairments | 26126837 |
| *FN1* | Fibronectin 1 | 0.702 | 2581.010 | 0.001 | 0.097 | 2 | 2335 | involved in cytoskeletal pathways, invasion and metastasis, shows decreased expression during mucosal inflammation in corhn's disease | 31889146, 17136547, 28314802, 31889146 |
| *ITGB2* | Integrin Subunit Beta 2 | 0.506 | 3.196 | 0.001 | 0.097 | 21 | 3689 | Inflammation, migration, cell-cell interaction | [31638091, 31837777](https://www.ncbi.nlm.nih.gov/pubmed/31638091) |
| *NCBP2-AS2* | NCBP2 Antisense 2 (Head To Head) | 0.779 | 1.780 | 0.001 | 0.097 | 3 | 152217 | related to migration and VEGF signaling | 30723174 |
| *RTF2* | Replication Termination Factor 2 | 0.620 | 3.262 | 0.001 | 0.097 | 20 | 51507 | key determinant for cells to manage replication stress and maintain genome integrity | 29290612 |
| *SCAF11* | SR-Related CTD Associated Factor 11 | 0.267 | 32.535 | 0.001 | 0.097 | 12 | 9169 | related pathways include apoptosis modulation and signaling, RNA metabolism | 25448681, 30989468 |
| *UCHL3* | Ubiquitin C-Terminal Hydrolase L3 | 0.445 | 3.454 | 0.001 | 0.097 | 13 | 7347 | associated with infalmmatory response by facilitating tumourigenesis. Activates NF-kB signaling | 31477831 |
| *ZNF280D* | Zinc Finger Protein 280D | 0.365 | 6.671 | 0.001 | 0.097 | 15 | 54816 | candidate dyslexia genes | 20798984 |
| *GLDN* | Gliomedin | 0.490 | 7.023 | 0.001 | 0.097 | 15 | 342035 | plays role in the formation and maintenance of nodes of Ranvier on myelinated axons | 16039564, 27616481 |
| *SPECC1L* | Sperm Antigen With Calponin Homology And Coiled-Coil Domains 1 Like | 0.331 | 10.986 | 0.001 | 0.097 | 22 | 23384 | Involved in cytokineses and spindle organization, required for proper cell adhesion and migration, related to facial development | 26111080, 21703590 |
| **Decreased expression in cases of cognitive impairment** | | | | | | | | | |
| *HBA2* | Hemoglobin Subunit Alpha 2 | -1.839 | 336.413 | 0.000 | 0.000 | 16 | 3040 | Oxygen transport from blood to peripheral tissues | 26104837 |
| *ARHGAP29* | Rho GTPase Activating Protein 29 | -0.425 | 21.637 | 0.000 | 0.002 | 1 | 9411 | Platelet count, associated with cleft palate | 31950859 |
| *ID2* | Inhibitor Of DNA Binding 2 | -0.749 | 5.533 | 0.000 | 0.002 | 2 | 3398 | Inflammation/ Immune regulation | 30413714 |
| *CBX5* | Chromobox 5 | -0.358 | 8.368 | 0.000 | 0.044 | 12 | 23468 | Inflammation and apoptosis | 32585856 |
| *STAM* | Signal Transducing Adaptor Molecule | -0.514 | 1.943 | 0.000 | 0.046 | 10 | 8027 | Involved in intracellular signal transduction mediated by cytokines and growth factors, may also play a role in T-cell development | 12551915, 10383417, 9407053 |
| *RC3H1* | Ring Finger And CCCH-Type Domains 1 | -0.402 | 4.581 | 0.000 | 0.070 | 1 | 149041 | Inflammation | 26000482 |
| *RBM47* | RNA Binding Motif Protein 47 | -0.473 | 5.288 | 0.000 | 0.076 | 4 | 54502 | Identified as a targetn gene of TGF-b in mammary gland epothelial cells, suppresses expression of cell metabolism-related genes | 26923328 |
| *HBB* | Hemoglobin Subunit Beta | -1.149 | 477.936 | 0.000 | 0.076 | 11 | 3043 | Inflammation, cytokine activity, heme binding | [33598484](https://www.ncbi.nlm.nih.gov/pubmed/33598484) |
| *BCL2L2-PABPN1* | BCL2L2-PABPN1 Readthrough | -0.331 | 10.206 | 0.001 | 0.096 | 14 | 100529063 | Promotes cell curvival, related to basal metabolic rate and body mass index. Found to be differentially expressed with regards to mild cognitive impairment. | 30990731, 31640099 |
| *HBG2* | Hemoglobin Subunit Gamma 2 | -0.970 | 80.690 | 0.001 | 0.096 | 11 | 3048 | Associated with anemia and cyanosis in newborns | 21561349, 2470017, 7741137 |
| *BANF1* | BAF Nuclear Assembly Factor 1 | -0.492 | 1.656 | 0.001 | 0.097 | 11 | 8815 | involved in mitaosis, intrinsic immunity against foreign DNA, trnascription regulation, and DNA damage response | 26072104, 21549337 |
| *BRD8* | Bromodomain Containing 8 | -0.249 | 15.046 | 0.001 | 0.097 | 5 | 10902 | Associated with tumor supporessor mediated growth arrest and replicative senescense, apoptosis, and DNA repair | 33476703 |
| *CPB1* | Carboxypeptidase B1 | -0.648 | 1.806 | 0.001 | 0.097 | 3 | 1360 | Encodes panceatic secretoy enzymes | 29669919, 31173193, 32272917 |
| *IQGAP1* | IQ Motif Containing GTPase Activating Protein 1 | -0.303 | 33.009 | 0.001 | 0.097 | 15 | 8826 | part of inflammatory and proliferation-related pathways, endometriosis, HNF-1b target gene | 32364766, 24648885 |
| *LOXL1* | Lysyl Oxidase Like 1 | -0.714 | 1.695 | 0.001 | 0.097 | 15 | 4016 | proliferation and inflammation, inhibits apoptosis | 32679142, 34014450 |
| *SETDB1* | SET Domain Bifurcated Histone Lysine Methyltransferase 1 | -0.408 | 2.301 | 0.001 | 0.097 | 1 | 9869 | silencing of euchromatic genes, pivotal roles for silencing endogenous and exogenous retroelements. Highly upregulated in tumor cells | 12869583, 32486217 |
| *SAFB2* | Scaffold Attachment Factor B2 | -0.297 | 8.253 | 0.001 | 0.097 | 19 | 9667 | Can function as an estrogen receptor corepressor and can inhibit cell proliferation. Involved in cell cycle regulation, differentiation, apoptosis, and stress response | 19901029, 12660241 |
| *SDCBP* | Syndecan Binding Protein | -0.386 | 10.271 | 0.001 | 0.097 | 8 | 6386 | Major contributor to the majority of independent metastatic events. Gene in the TGF-B network | 32061839, 25313409 |
| *SERPINB9* | Serpin Family B Member 9 | -0.435 | 10.232 | 0.001 | 0.097 | 6 | 5272 | Important for tumor cell survival | 30127393, 33242418 |
| *TMEM192* | Transmembrane Protein 192 | -0.474 | 2.994 | 0.001 | 0.097 | 4 | 201931 | Deficency of this gene results in growth inhibition and increased apoptosis | 28504966, 27989102 |

| **Supplemental Table 3. Sex stratified results of mRNAs identified with significant differential expression associated with neurodevelopment.** Covariates included: maternal age, birthweight, infant sex, health insurance status. Significance defined as BH adjusted p values <0.1 and fold change greater than absolute value of log2(1.5). BH (Benjamini-Hochberg) | | | | | | |
| --- | --- | --- | --- | --- | --- | --- |
| **Gene** | **Fold Change (log2)** | **Base Mean** | **P-value** | **BH-adjusted p-value** | **Significant in Males** | **Significant in Females** |
| *HBA2* | -1.838762644 | 336.4131089 | 5.26E-08 | 0.000261159 | Yes | No |
| *TMEM43* | 0.958067158 | 3.465755967 | 3.95E-07 | 0.000980702 | Yes | No |
| *ARHGAP29* | -0.425148432 | 21.63739002 | 1.72E-06 | 0.00213055 | Yes | No |
| *ID2* | -0.748801484 | 5.53327837 | 1.64E-06 | 0.00213055 | Yes | No |
| *CDC16* | 0.730446783 | 2.764228065 | 2.87E-05 | 0.026304804 | No | No |
| *STXBP3* | 0.669895549 | 3.478774181 | 3.18E-05 | 0.026304804 | Yes | No |
| *CBX5* | -0.357617778 | 8.367505972 | 0.00013355 | 0.044075586 | No | No |
| *FAM135A* | 0.585898452 | 5.690740411 | 7.60E-05 | 0.044075586 | No | No |
| *GDPD5* | 0.602902064 | 17.21477482 | 0.00012824 | 0.044075586 | No | No |
| *HIPK3* | 0.614703448 | 4.776794364 | 0.00013852 | 0.044075586 | No | No |
| *ITPRIPL2* | 0.532231293 | 20.97315001 | 0.00014212 | 0.044075586 | Yes | No |
| *KAT2B* | 0.865667639 | 1.985891832 | 9.85E-05 | 0.044075586 | Yes | No |
| *RAB5A* | 0.431469769 | 12.03138798 | 6.72E-05 | 0.044075586 | Yes | No |
| *SRPK2* | 0.457571816 | 7.047687559 | 0.00013569 | 0.044075586 | No | No |
| *TMEM212* | 0.355031522 | 18.90540657 | 0.00011895 | 0.044075586 | Yes | No |
| *TVP23B* | 0.637436806 | 6.345885268 | 8.56E-05 | 0.044075586 | No | No |
| *GBP3* | 0.754717245 | 2.403073577 | 0.00016665 | 0.045940391 | No | No |
| *STAM* | -0.513654871 | 1.942978038 | 0.00016101 | 0.045940391 | No | No |
| *RC3H1* | -0.401537203 | 4.581436584 | 0.00026791 | 0.069967367 | Yes | No |
| *MLLT10* | 0.402345268 | 12.45482193 | 0.0003403 | 0.076089507 | No | No |
| *PYGL* | 0.478396535 | 5.987788832 | 0.00035269 | 0.076089507 | Yes | No |
| *RBM47* | -0.472883407 | 5.288104933 | 0.00033455 | 0.076089507 | No | No |
| *STX7* | 0.491946635 | 7.509268155 | 0.00033786 | 0.076089507 | No | No |
| *FABP4* | 1.057983831 | 2.254677202 | 0.00039894 | 0.076136491 | No | No |
| *GNAI1* | 0.640371434 | 2.538557391 | 0.00038432 | 0.076136491 | Yes | No |
| *HBB* | -1.148958145 | 477.9360625 | 0.000369 | 0.076136491 | No | No |
| *BCL2L2-PABPN1* | -0.330689969 | 10.20591012 | 0.00053271 | 0.096477451 | No | No |
| *HBG2* | -0.969538871 | 80.69004502 | 0.00054441 | 0.096477451 | No | No |
| *ARFGEF2* | 0.414751353 | 10.42874526 | 0.00081494 | 0.097018314 | No | No |
| *BANF1* | -0.491930154 | 1.656405079 | 0.00082119 | 0.097018314 | No | No |
| *BRD8* | -0.248562944 | 15.04590702 | 0.00075263 | 0.097018314 | Yes | No |
| *CPB1* | -0.64833695 | 1.806371257 | 0.00073196 | 0.097018314 | Yes | No |
| *FN1* | 0.701549308 | 2581.010424 | 0.00072546 | 0.097018314 | No | No |
| *IQGAP1* | -0.3028218 | 33.00895066 | 0.00074599 | 0.097018314 | No | No |
| *ITGB2* | 0.505933937 | 3.196234044 | 0.00073194 | 0.097018314 | No | No |
| *LOXL1* | -0.714184232 | 1.694861084 | 0.0007283 | 0.097018314 | Yes | No |
| *NCBP2-AS2* | 0.778859084 | 1.780383405 | 0.0005877 | 0.097018314 | No | No |
| *RTF2* | 0.619721653 | 3.262134034 | 0.00064866 | 0.097018314 | No | No |
| *SCAF11* | 0.26683896 | 32.53462351 | 0.00071043 | 0.097018314 | No | No |
| *SETDB1* | -0.408029195 | 2.300949681 | 0.00081905 | 0.097018314 | No | No |
| *UCHL3* | 0.445234496 | 3.453518813 | 0.00062335 | 0.097018314 | No | No |
| *ZNF280D* | 0.364503055 | 6.670531603 | 0.00080048 | 0.097018314 | No | No |
| *GLDN* | 0.490291832 | 7.022756413 | 0.00089633 | 0.097118515 | No | No |
| *SAFB2* | -0.297485429 | 8.252910046 | 0.00086095 | 0.097118515 | Yes | No |
| *SDCBP* | -0.385909659 | 10.2705559 | 0.00092339 | 0.097118515 | No | No |
| *SERPINB9* | -0.434887453 | 10.23195262 | 0.00093948 | 0.097118515 | No | No |
| *SPECC1L* | 0.330727813 | 10.9857225 | 0.00091324 | 0.097118515 | No | No |
| *TMM192* | -0.474046707 | 2.994435038 | 0.00087683 | 0.097118515 | No | No |

| **Supplemental Table 4. A total of 1,101 predicted miRNA-mRNA expression pairs, constituting 289 unique miRNA and 37 unique mRNAs.** Expression pair correlations identified from between differentially expressed miRNAs and their gene targets. Correlation between variance stabilized counts of miRNA and mRNA was calculated and the Pearson correlation coefficient and Benjamini-Hochberg adjusted p-value (<0.1) are shown here. | | | |
| --- | --- | --- | --- |
| **miRNA** | **mRNA** | **correlation coefficient** | **BH-adjusted p-value** |
| miR-765 | *IQGAP1* | -0.624 | 0.000 |
| miR-296-3p | *IQGAP1* | -0.615 | 0.000 |
| miR-765 | *RAB5A* | -0.590 | 0.000 |
| miR-765 | *CBX5* | -0.580 | 0.000 |
| miR-765 | *RBM47* | -0.535 | 0.000 |
| miR-765 | *SERPINB9* | -0.510 | 0.000 |
| miR-296-3p | *RC3H1* | -0.497 | 0.000 |
| miR-296-3p | *SERPINB9* | -0.495 | 0.000 |
| miR-765 | *SDCBP* | -0.492 | 0.000 |
| miR-885-3p | *SERPINB9* | -0.490 | 0.000 |
| miR-885-3p | *TMEM192* | -0.489 | 0.000 |
| miR-765 | *GDPD5* | -0.473 | 0.000 |
| miR-1207-5p | *CBX5* | -0.458 | 0.000 |
| miR-885-3p | *RC3H1* | -0.456 | 0.000 |
| miR-671-5p | *RAB5A* | -0.453 | 0.000 |
| miR-920 | *RC3H1* | -0.453 | 0.000 |
| miR-936 | *RC3H1* | -0.447 | 0.000 |
| miR-877-5p | *IQGAP1* | -0.439 | 0.000 |
| miR-936 | *SDCBP* | -0.428 | 0.000 |
| miR-202-3p | *RBM47* | -0.425 | 0.000 |
| miR-1202 | *RBM47* | -0.410 | 0.000 |
| miR-885-3p | *SDCBP* | -0.408 | 0.000 |
| miR-939-5p | *CBX5* | -0.398 | 0.000 |
| miR-1290 | *RC3H1* | -0.394 | 0.000 |
| miR-765 | *MLLT10* | -0.391 | 0.000 |
| miR-296-3p | *LOXL1* | -0.389 | 0.000 |
| miR-939-5p | *RBM47* | -0.387 | 0.000 |
| miR-920 | *LOXL1* | -0.383 | 0.000 |
| miR-671-5p | *RC3H1* | -0.372 | 0.000 |
| miR-1182 | *RBM47* | -0.372 | 0.000 |
| miR-1182 | *RC3H1* | -0.358 | 0.000 |
| miR-877-5p | *SERPINB9* | -0.357 | 0.000 |
| miR-877-5p | *RC3H1* | -0.353 | 0.000 |
| miR-885-3p | *STX7* | -0.350 | 0.000 |
| miR-939-5p | *GDPD5* | -0.348 | 0.000 |
| miR-202-3p | *SERPINB9* | -0.348 | 0.000 |
| miR-658 | *RBM47* | -0.343 | 0.000 |
| miR-1207-5p | *STX7* | -0.342 | 0.000 |
| miR-939-5p | *RC3H1* | -0.332 | 0.000 |
| miR-885-3p | *MLLT10* | -0.323 | 0.000 |
| miR-1290 | *CPB1* | -0.323 | 0.000 |
| miR-1224-5p | *RBM47* | -0.319 | 0.000 |
| miR-877-5p | *GDPD5* | -0.318 | 0.000 |
| miR-296-3p | *ZNF280D* | -0.302 | 0.000 |
| miR-1182 | *LOXL1* | -0.302 | 0.000 |
| miR-202-3p | *LOXL1* | -0.297 | 0.000 |
| miR-202-3p | *GDPD5* | -0.287 | 0.000 |
| miR-202-3p | *ARHGAP29* | -0.282 | 0.000 |
| miR-658 | *SERPINB9* | -0.282 | 0.000 |
| miR-1290 | *ARFGEF2* | -0.280 | 0.000 |
| miR-1207-5p | *LOXL1* | -0.277 | 0.000 |
| miR-1224-5p | *STX7* | -0.275 | 0.000 |
| miR-936 | *FN1* | -0.258 | 0.000 |
| miR-1182 | *FN1* | -0.249 | 0.000 |
| miR-939-5p | *LOXL1* | -0.243 | 0.000 |
| miR-936 | *FAM135A* | -0.240 | 0.000 |
| miR-202-3p | *MLLT10* | -0.239 | 0.000 |
| miR-885-3p | *SETDB1* | -0.235 | 0.000 |
| miR-877-5p | *ARFGEF2* | -0.230 | 0.000 |
| miR-939-5p | *GNAI1* | -0.230 | 0.000 |
| miR-555 | *MLLT10* | -0.229 | 0.000 |
| miR-202-3p | *FN1* | -0.225 | 0.000 |
| miR-555 | *IQGAP1* | -0.223 | 0.000 |
| miR-296-3p | *SETDB1* | -0.216 | 0.000 |
| miR-671-5p | *TMEM43* | -0.209 | 0.000 |
| miR-555 | *STX7* | -0.200 | 0.001 |
| miR-658 | *BANF1* | -0.199 | 0.001 |
| miR-920 | *SETDB1* | -0.195 | 0.001 |
| miR-590-5p | *ARHGAP29* | -0.193 | 0.001 |
| miR-556-5p | *ZNF280D* | -0.191 | 0.001 |
| miR-671-5p | *SETDB1* | -0.190 | 0.002 |
| miR-202-3p | *FAM135A* | -0.189 | 0.002 |
| miR-320d | *ARFGEF2* | -0.185 | 0.002 |
| miR-654-5p | *ARHGAP29* | -0.185 | 0.002 |
| miR-320c | *ARFGEF2* | -0.181 | 0.003 |
| miR-936 | *SETDB1* | -0.179 | 0.003 |
| miR-555 | *ZNF280D* | -0.177 | 0.004 |
| miR-1202 | *MLLT10* | -0.176 | 0.004 |
| miR-212-3p | *ZNF280D* | -0.174 | 0.004 |
| miR-561-3p | *ZNF280D* | -0.174 | 0.005 |
| miR-1182 | *SRPK2* | -0.173 | 0.005 |
| miR-877-5p | *STXBP3* | -0.173 | 0.005 |
| miR-202-3p | *TMEM43* | -0.168 | 0.006 |
| miR-212-3p | *ARHGAP29* | -0.167 | 0.007 |
| miR-556-3p | *ARHGAP29* | -0.163 | 0.009 |
| miR-517-5p | *ZNF280D* | -0.161 | 0.010 |
| miR-362-3p | *MLLT10* | -0.160 | 0.010 |
| miR-1275 | *MLLT10* | -0.160 | 0.010 |
| miR-323b-5p | *FN1* | -0.158 | 0.012 |
| miR-561-3p | *ARHGAP29* | -0.157 | 0.012 |
| miR-556-3p | *ZNF280D* | -0.155 | 0.014 |
| miR-522-3p | *RBM47* | -0.155 | 0.014 |
| miR-33b-5p | *MLLT10* | -0.154 | 0.015 |
| miR-656-3p | *ARFGEF2* | -0.153 | 0.015 |
| miR-944 | *RAB5A* | -0.153 | 0.016 |
| miR-522-3p | *ID2* | -0.153 | 0.016 |
| miR-365a-3p | *ZNF280D* | -0.152 | 0.016 |
| miR-1207-5p | *FN1* | -0.152 | 0.016 |
| miR-1290 | *ZNF280D* | -0.151 | 0.018 |
| miR-550a-5p | *LOXL1* | -0.149 | 0.019 |
| miR-575 | *SERPINB9* | -0.148 | 0.021 |
| miR-555 | *RC3H1* | -0.147 | 0.022 |
| miR-944 | *MLLT10* | -0.146 | 0.023 |
| miR-320a | *IQGAP1* | -0.146 | 0.023 |
| miR-33b-5p | *ARHGAP29* | -0.145 | 0.024 |
| miR-656-3p | *MLLT10* | -0.143 | 0.027 |
| miR-320c | *MLLT10* | -0.143 | 0.028 |
| miR-320d | *MLLT10* | -0.142 | 0.028 |
| miR-29a-3p | *ZNF280D* | -0.142 | 0.029 |
| miR-320b | *ARFGEF2* | -0.141 | 0.030 |
| miR-1321 | *LOXL1* | -0.141 | 0.030 |
| miR-760 | *SERPINB9* | -0.141 | 0.031 |
| miR-34b-3p | *MLLT10* | -0.140 | 0.031 |
| miR-132-3p | *ARHGAP29* | -0.139 | 0.033 |
| miR-362-3p | *ARFGEF2* | -0.138 | 0.035 |
| miR-556-5p | *MLLT10* | -0.136 | 0.039 |
| miR-561-3p | *UCHL3* | -0.136 | 0.040 |
| miR-320a | *RBM47* | -0.133 | 0.045 |
| miR-361-5p | *MLLT10* | -0.133 | 0.046 |
| miR-920 | *GLDN* | -0.133 | 0.046 |
| miR-550a-5p | *SERPINB9* | -0.133 | 0.046 |
| miR-369-3p | *MLLT10* | -0.133 | 0.046 |
| miR-1207-5p | *KAT2B* | -0.133 | 0.046 |
| miR-22-3p | *MLLT10* | -0.132 | 0.048 |
| miR-323b-5p | *RC3H1* | -0.131 | 0.051 |
| miR-320c | *BANF1* | -0.131 | 0.051 |
| miR-29c-3p | *ARFGEF2* | -0.130 | 0.052 |
| miR-1183 | *LOXL1* | -0.129 | 0.056 |
| miR-320d | *BANF1* | -0.128 | 0.057 |
| miR-296-3p | *KAT2B* | -0.127 | 0.061 |
| miR-944 | *STX7* | -0.127 | 0.062 |
| miR-561-3p | *FAM135A* | -0.126 | 0.063 |
| miR-202-3p | *SETDB1* | -0.126 | 0.063 |
| miR-514a-3p | *BRD8* | -0.124 | 0.069 |
| miR-29a-3p | *ARFGEF2* | -0.123 | 0.071 |
| miR-365a-3p | *RBM47* | -0.123 | 0.072 |
| miR-320a | *SETDB1* | -0.123 | 0.073 |
| miR-608 | *RC3H1* | -0.123 | 0.074 |
| miR-33b-5p | *FAM135A* | -0.122 | 0.077 |
| miR-320a | *TMEM192* | -0.122 | 0.077 |
| miR-298 | *HBG2* | -0.121 | 0.079 |
| miR-1283 | *MLLT10* | -0.119 | 0.087 |
| miR-320b | *MLLT10* | -0.119 | 0.087 |
| miR-362-3p | *GDPD5* | -0.119 | 0.087 |
| miR-206 | *RAB5A* | -0.119 | 0.089 |
| miR-369-3p | *BRD8* | -0.118 | 0.089 |
| miR-125a-3p | *MLLT10* | -0.118 | 0.091 |
| miR-212-3p | *STXBP3* | -0.117 | 0.095 |
| miR-125a-3p | *TMEM192* | -0.117 | 0.095 |
| miR-654-5p | *SETDB1* | -0.117 | 0.096 |
| miR-1183 | *RC3H1* | -0.117 | 0.097 |
| miR-1290 | *KAT2B* | -0.116 | 0.098 |
| miR-320b | *BANF1* | -0.116 | 0.099 |
| miR-374b-5p | *ARHGAP29* | 0.116 | 0.100 |
| miR-148b-3p | *TMEM43* | 0.116 | 0.099 |
| miR-377-3p | *RBM47* | 0.116 | 0.099 |
| miR-515-5p | *STXBP3* | 0.116 | 0.098 |
| miR-519c-3p | *ARHGAP29* | 0.116 | 0.097 |
| miR-372-3p | *MLLT10* | 0.116 | 0.097 |
| miR-637 | *LOXL1* | 0.117 | 0.096 |
| miR-222-3p | *KAT2B* | 0.117 | 0.095 |
| miR-9-5p | *ARFGEF2* | 0.117 | 0.095 |
| miR-222-3p | *GLDN* | 0.117 | 0.094 |
| miR-582-5p | *TMEM192* | 0.118 | 0.092 |
| miR-218-5p | *STX7* | 0.118 | 0.092 |
| miR-612 | *GLDN* | 0.118 | 0.091 |
| miR-7-5p | *IQGAP1* | 0.118 | 0.091 |
| miR-503-5p | *SPECC1L* | 0.118 | 0.090 |
| miR-449a | *TMEM192* | 0.118 | 0.089 |
| miR-515-5p | *TMEM43* | 0.119 | 0.089 |
| miR-643 | *MLLT10* | 0.119 | 0.088 |
| miR-498 | *SDCBP* | 0.119 | 0.087 |
| miR-186-5p | *GNAI1* | 0.119 | 0.087 |
| miR-455-5p | *STX7* | 0.119 | 0.087 |
| miR-424-5p | *SERPINB9* | 0.119 | 0.087 |
| miR-647 | *STXBP3* | 0.119 | 0.087 |
| miR-141-3p | *RBM47* | 0.119 | 0.086 |
| miR-7-5p | *RC3H1* | 0.119 | 0.085 |
| miR-34c-3p | *FN1* | 0.120 | 0.085 |
| miR-485-3p | *ARHGAP29* | 0.120 | 0.085 |
| miR-140-5p | *IQGAP1* | 0.120 | 0.084 |
| miR-637 | *SETDB1* | 0.120 | 0.083 |
| miR-664a-3p | *KAT2B* | 0.120 | 0.082 |
| miR-421 | *FN1* | 0.120 | 0.082 |
| miR-600 | *SETDB1* | 0.120 | 0.082 |
| miR-495-3p | *ARFGEF2* | 0.120 | 0.082 |
| miR-384 | *STAM* | 0.121 | 0.081 |
| miR-641 | *SETDB1* | 0.121 | 0.080 |
| miR-661 | *CBX5* | 0.121 | 0.080 |
| miR-769-5p | *KAT2B* | 0.121 | 0.080 |
| miR-624-3p | *SDCBP* | 0.121 | 0.079 |
| miR-217 | *FN1* | 0.121 | 0.078 |
| miR-520e | *RC3H1* | 0.121 | 0.078 |
| miR-558 | *STX7* | 0.122 | 0.078 |
| miR-26a-5p | *TMEM43* | 0.122 | 0.078 |
| miR-30c-5p | *KAT2B* | 0.122 | 0.076 |
| miR-449b-5p | *RC3H1* | 0.122 | 0.076 |
| miR-224-5p | *SETDB1* | 0.122 | 0.076 |
| miR-548l | *STX7* | 0.122 | 0.076 |
| miR-519b-3p | *ID2* | 0.122 | 0.075 |
| miR-600 | *MLLT10* | 0.122 | 0.075 |
| miR-199a-3p | *STAM* | 0.122 | 0.075 |
| miR-494-3p | *ZNF280D* | 0.123 | 0.074 |
| miR-211-5p | *STX7* | 0.123 | 0.074 |
| miR-539-5p | *TMEM192* | 0.123 | 0.073 |
| miR-618 | *RC3H1* | 0.123 | 0.072 |
| miR-562 | *RC3H1* | 0.123 | 0.072 |
| miR-498 | *RAB5A* | 0.123 | 0.071 |
| miR-640 | *RBM47* | 0.124 | 0.070 |
| miR-28-5p | *FN1* | 0.124 | 0.069 |
| miR-155-5p | *RBM47* | 0.124 | 0.069 |
| miR-34a-5p | *IQGAP1* | 0.124 | 0.068 |
| miR-452-5p | *MLLT10* | 0.124 | 0.068 |
| miR-449a | *RBM47* | 0.125 | 0.068 |
| miR-127-5p | *ZNF280D* | 0.125 | 0.068 |
| miR-222-3p | *SDCBP* | 0.125 | 0.066 |
| miR-432-5p | *IQGAP1* | 0.125 | 0.066 |
| miR-300 | *STX7* | 0.125 | 0.066 |
| miR-543 | *FAM135A* | 0.125 | 0.066 |
| miR-452-5p | *SERPINB9* | 0.125 | 0.065 |
| miR-132-3p | *IQGAP1* | 0.125 | 0.065 |
| miR-424-5p | *SDCBP* | 0.126 | 0.064 |
| miR-543 | *STAM* | 0.126 | 0.063 |
| miR-1289 | *ZNF280D* | 0.126 | 0.063 |
| miR-595 | *TMEM43* | 0.126 | 0.063 |
| miR-650 | *SRPK2* | 0.126 | 0.063 |
| miR-621 | *SETDB1* | 0.126 | 0.063 |
| miR-199b-5p | *IQGAP1* | 0.127 | 0.062 |
| miR-373-3p | *RC3H1* | 0.127 | 0.062 |
| miR-298 | *FN1* | 0.127 | 0.062 |
| miR-33a-5p | *RAB5A* | 0.127 | 0.061 |
| miR-297 | *GNAI1* | 0.127 | 0.061 |
| miR-26a-5p | *FAM135A* | 0.127 | 0.060 |
| miR-573 | *SRPK2* | 0.127 | 0.060 |
| miR-199b-5p | *SDCBP* | 0.127 | 0.059 |
| miR-597-5p | *STX7* | 0.127 | 0.059 |
| miR-558 | *SETDB1* | 0.128 | 0.059 |
| miR-520e | *RBM47* | 0.128 | 0.059 |
| miR-484 | *RC3H1* | 0.128 | 0.058 |
| miR-377-3p | *ARHGAP29* | 0.128 | 0.058 |
| miR-34b-3p | *FN1* | 0.128 | 0.058 |
| miR-548k | *STAM* | 0.128 | 0.058 |
| miR-181b-5p | *SPECC1L* | 0.128 | 0.057 |
| miR-650 | *CBX5* | 0.128 | 0.057 |
| miR-218-5p | *GNAI1* | 0.128 | 0.057 |
| miR-373-3p | *ARHGAP29* | 0.128 | 0.057 |
| miR-449b-5p | *HBG2* | 0.128 | 0.057 |
| miR-573 | *MLLT10* | 0.128 | 0.057 |
| miR-337-3p | *ARHGAP29* | 0.129 | 0.056 |
| miR-449a | *IQGAP1* | 0.129 | 0.056 |
| miR-139-3p | *SDCBP* | 0.129 | 0.056 |
| miR-452-5p | *HIPK3* | 0.129 | 0.055 |
| miR-301a-3p | *KAT2B* | 0.129 | 0.055 |
| miR-23b-3p | *RBM47* | 0.129 | 0.055 |
| miR-515-5p | *GNAI1* | 0.129 | 0.055 |
| miR-770-5p | *SETDB1* | 0.129 | 0.055 |
| miR-542-3p | *RBM47* | 0.129 | 0.054 |
| miR-105-5p | *ZNF280D* | 0.130 | 0.053 |
| miR-378a-3p | *ARHGAP29* | 0.130 | 0.053 |
| miR-34a-5p | *ARHGAP29* | 0.130 | 0.053 |
| miR-543 | *MLLT10* | 0.130 | 0.053 |
| miR-576-5p | *SDCBP* | 0.130 | 0.053 |
| let-7e-5p | *SETDB1* | 0.130 | 0.053 |
| miR-27a-3p | *SDCBP* | 0.130 | 0.053 |
| miR-148b-3p | *SETDB1* | 0.130 | 0.053 |
| miR-541-3p | *SETDB1* | 0.130 | 0.053 |
| miR-211-5p | *GDPD5* | 0.130 | 0.052 |
| miR-373-3p | *RBM47* | 0.130 | 0.052 |
| miR-409-3p | *PYGL* | 0.130 | 0.052 |
| miR-584-5p | *TMEM192* | 0.130 | 0.052 |
| miR-495-3p | *HIPK3* | 0.130 | 0.052 |
| miR-29b-3p | *SERPINB9* | 0.131 | 0.051 |
| miR-34c-5p | *TMEM192* | 0.131 | 0.051 |
| miR-1272 | *STAM* | 0.131 | 0.051 |
| miR-145-5p | *RC3H1* | 0.131 | 0.051 |
| miR-875-3p | *FAM135A* | 0.131 | 0.050 |
| miR-532-5p | *KAT2B* | 0.131 | 0.049 |
| miR-876-3p | *IQGAP1* | 0.132 | 0.048 |
| miR-1276 | *SRPK2* | 0.132 | 0.048 |
| miR-491-3p | *SERPINB9* | 0.132 | 0.048 |
| miR-495-3p | *RC3H1* | 0.132 | 0.047 |
| miR-520b | *RC3H1* | 0.132 | 0.047 |
| miR-922 | *ZNF280D* | 0.133 | 0.046 |
| miR-503-5p | *STXBP3* | 0.133 | 0.046 |
| miR-328-3p | *TMEM43* | 0.133 | 0.046 |
| miR-34a-5p | *TMEM192* | 0.133 | 0.046 |
| miR-222-3p | *FAM135A* | 0.133 | 0.045 |
| miR-432-5p | *HIPK3* | 0.133 | 0.045 |
| miR-222-3p | *SRPK2* | 0.133 | 0.045 |
| miR-498 | *ARFGEF2* | 0.134 | 0.043 |
| miR-26a-5p | *GLDN* | 0.134 | 0.043 |
| miR-650 | *RC3H1* | 0.134 | 0.043 |
| miR-127-3p | *ZNF280D* | 0.134 | 0.043 |
| miR-646 | *SDCBP* | 0.135 | 0.042 |
| miR-605-5p | *MLLT10* | 0.135 | 0.042 |
| miR-532-5p | *IQGAP1* | 0.135 | 0.042 |
| miR-27b-3p | *ID2* | 0.135 | 0.041 |
| miR-30e-5p | *STX7* | 0.135 | 0.041 |
| miR-145-5p | *RBM47* | 0.135 | 0.041 |
| miR-562 | *SERPINB9* | 0.135 | 0.041 |
| miR-222-3p | *MLLT10* | 0.135 | 0.040 |
| miR-432-5p | *STXBP3* | 0.136 | 0.040 |
| miR-297 | *RBM47* | 0.136 | 0.040 |
| miR-23b-3p | *STX7* | 0.136 | 0.039 |
| miR-637 | *RC3H1* | 0.136 | 0.039 |
| miR-644a | *BRD8* | 0.136 | 0.039 |
| miR-33a-5p | *LOXL1* | 0.136 | 0.039 |
| miR-433-3p | *STXBP3* | 0.137 | 0.037 |
| miR-9-5p | *IQGAP1* | 0.137 | 0.037 |
| miR-502-5p | *SETDB1* | 0.137 | 0.036 |
| miR-573 | *SETDB1* | 0.138 | 0.036 |
| miR-328-3p | *SETDB1* | 0.138 | 0.036 |
| miR-661 | *RC3H1* | 0.138 | 0.036 |
| miR-634 | *GLDN* | 0.138 | 0.036 |
| miR-876-3p | *TMEM43* | 0.138 | 0.036 |
| miR-200c-3p | *ID2* | 0.138 | 0.035 |
| miR-432-5p | *SERPINB9* | 0.138 | 0.035 |
| miR-495-3p | *IQGAP1* | 0.138 | 0.035 |
| miR-450b-5p | *RBM47* | 0.138 | 0.035 |
| miR-10a-5p | *ITGB2* | 0.139 | 0.034 |
| miR-211-5p | *RC3H1* | 0.139 | 0.034 |
| miR-643 | *HIPK3* | 0.139 | 0.034 |
| miR-643 | *FAM135A* | 0.139 | 0.034 |
| miR-23b-3p | *SDCBP* | 0.139 | 0.033 |
| miR-597-5p | *ID2* | 0.139 | 0.033 |
| miR-645 | *FN1* | 0.139 | 0.033 |
| miR-187-3p | *RBM47* | 0.140 | 0.033 |
| miR-493-3p | *IQGAP1* | 0.140 | 0.033 |
| miR-297 | *ARFGEF2* | 0.140 | 0.031 |
| miR-495-3p | *RAB5A* | 0.141 | 0.031 |
| miR-605-5p | *FAM135A* | 0.141 | 0.030 |
| miR-452-5p | *IQGAP1* | 0.141 | 0.030 |
| miR-502-5p | *SRPK2* | 0.141 | 0.030 |
| miR-620 | *RBM47* | 0.141 | 0.029 |
| miR-409-3p | *ZNF280D* | 0.142 | 0.029 |
| miR-147b | *IQGAP1* | 0.142 | 0.029 |
| let-7e-5p | *FAM135A* | 0.142 | 0.029 |
| miR-574-5p | *RC3H1* | 0.142 | 0.029 |
| miR-219a-1-3p | *GDPD5* | 0.142 | 0.029 |
| miR-938 | *TMEM192* | 0.142 | 0.028 |
| miR-455-3p | *SRPK2* | 0.142 | 0.028 |
| miR-409-3p | *ARHGAP29* | 0.142 | 0.028 |
| miR-539-5p | *STAM* | 0.143 | 0.028 |
| miR-362-5p | *GLDN* | 0.143 | 0.028 |
| miR-409-3p | *RC3H1* | 0.143 | 0.028 |
| miR-485-5p | *GDPD5* | 0.143 | 0.028 |
| miR-30b-5p | *GNAI1* | 0.143 | 0.028 |
| miR-562 | *STAM* | 0.143 | 0.027 |
| miR-183-5p | *IQGAP1* | 0.143 | 0.027 |
| miR-30e-5p | *ARHGAP29* | 0.143 | 0.027 |
| miR-519d-3p | *GLDN* | 0.143 | 0.027 |
| miR-574-5p | *SERPINB9* | 0.143 | 0.027 |
| miR-501-5p | *MLLT10* | 0.143 | 0.027 |
| miR-374b-5p | *PYGL* | 0.144 | 0.027 |
| miR-515-5p | *SRPK2* | 0.144 | 0.026 |
| miR-374b-5p | *ID2* | 0.144 | 0.025 |
| miR-409-3p | *SERPINB9* | 0.145 | 0.024 |
| miR-766-3p | *SETDB1* | 0.146 | 0.023 |
| miR-374b-5p | *TMEM192* | 0.146 | 0.023 |
| miR-515-5p | *MLLT10* | 0.146 | 0.023 |
| miR-374b-5p | *SERPINB9* | 0.146 | 0.023 |
| miR-892b | *SDCBP* | 0.146 | 0.023 |
| miR-541-3p | *RC3H1* | 0.146 | 0.023 |
| miR-620 | *SERPINB9* | 0.146 | 0.023 |
| miR-135b-5p | *FAM135A* | 0.147 | 0.022 |
| miR-562 | *SDCBP* | 0.147 | 0.022 |
| miR-561-3p | *SDCBP* | 0.147 | 0.022 |
| miR-616-3p | *SERPINB9* | 0.148 | 0.021 |
| miR-520c-3p | *RC3H1* | 0.148 | 0.021 |
| miR-452-5p | *SDCBP* | 0.148 | 0.021 |
| miR-628-5p | *RC3H1* | 0.148 | 0.021 |
| miR-381-3p | *RBM47* | 0.148 | 0.020 |
| miR-34b-5p | *RC3H1* | 0.149 | 0.020 |
| miR-591 | *SDCBP* | 0.149 | 0.020 |
| miR-646 | *GLDN* | 0.149 | 0.020 |
| miR-637 | *RBM47* | 0.149 | 0.020 |
| miR-422a | *RBM47* | 0.150 | 0.019 |
| miR-770-5p | *FAM135A* | 0.150 | 0.019 |
| miR-548b-5p | *TMEM192* | 0.150 | 0.018 |
| miR-500a-5p | *TMEM43* | 0.150 | 0.018 |
| miR-373-3p | *RAB5A* | 0.150 | 0.018 |
| miR-622 | *TMEM43* | 0.150 | 0.018 |
| miR-548k | *RBM47* | 0.150 | 0.018 |
| miR-485-3p | *IQGAP1* | 0.150 | 0.018 |
| miR-323a-5p | *TMEM192* | 0.150 | 0.018 |
| miR-330-3p | *GLDN* | 0.150 | 0.018 |
| miR-873-5p | *RBM47* | 0.150 | 0.018 |
| miR-1271-5p | *FN1* | 0.151 | 0.018 |
| miR-921 | *RBM47* | 0.151 | 0.018 |
| miR-361-3p | *SETDB1* | 0.151 | 0.018 |
| miR-211-5p | *SERPINB9* | 0.151 | 0.018 |
| miR-222-3p | *RC3H1* | 0.151 | 0.017 |
| miR-1244 | *KAT2B* | 0.151 | 0.017 |
| miR-634 | *SETDB1* | 0.151 | 0.017 |
| miR-520d-3p | *SRPK2* | 0.151 | 0.017 |
| miR-335-5p | *SERPINB9* | 0.151 | 0.017 |
| miR-628-5p | *RBM47* | 0.152 | 0.017 |
| miR-127-5p | *SERPINB9* | 0.152 | 0.017 |
| let-7e-5p | *MLLT10* | 0.152 | 0.017 |
| miR-450b-3p | *CPB1* | 0.152 | 0.017 |
| miR-500a-5p | *MLLT10* | 0.152 | 0.017 |
| miR-105-5p | *RAB5A* | 0.152 | 0.017 |
| miR-34b-5p | *STX7* | 0.152 | 0.017 |
| miR-138-5p | *GLDN* | 0.152 | 0.016 |
| miR-501-5p | *TMEM43* | 0.153 | 0.016 |
| miR-455-5p | *HIPK3* | 0.153 | 0.016 |
| miR-222-3p | *CBX5* | 0.153 | 0.016 |
| miR-183-5p | *FN1* | 0.153 | 0.016 |
| miR-374b-5p | *ITGB2* | 0.153 | 0.016 |
| miR-330-3p | *KAT2B* | 0.153 | 0.015 |
| miR-520f-3p | *RBM47* | 0.153 | 0.015 |
| miR-485-3p | *RC3H1* | 0.154 | 0.015 |
| miR-1254 | *MLLT10* | 0.154 | 0.015 |
| miR-409-3p | *RAB5A* | 0.154 | 0.015 |
| miR-500a-5p | *ZNF280D* | 0.154 | 0.015 |
| miR-372-3p | *STX7* | 0.154 | 0.015 |
| miR-595 | *GNAI1* | 0.154 | 0.015 |
| miR-301a-3p | *SRPK2* | 0.154 | 0.015 |
| miR-516b-5p | *MLLT10* | 0.154 | 0.015 |
| miR-516b-5p | *GLDN* | 0.155 | 0.014 |
| miR-181c-5p | *GLDN* | 0.155 | 0.014 |
| miR-492 | *IQGAP1* | 0.155 | 0.014 |
| miR-557 | *SDCBP* | 0.155 | 0.014 |
| miR-135b-5p | *SDCBP* | 0.155 | 0.014 |
| miR-31-5p | *TMEM192* | 0.156 | 0.014 |
| miR-452-5p | *FAM135A* | 0.156 | 0.013 |
| miR-335-5p | *IQGAP1* | 0.156 | 0.013 |
| miR-875-3p | *MLLT10* | 0.156 | 0.013 |
| miR-335-5p | *BANF1* | 0.156 | 0.013 |
| miR-922 | *RBM47* | 0.157 | 0.013 |
| miR-503-5p | *MLLT10* | 0.157 | 0.013 |
| miR-520d-3p | *STX7* | 0.157 | 0.013 |
| miR-597-5p | *STAM* | 0.157 | 0.013 |
| miR-520f-3p | *RC3H1* | 0.157 | 0.012 |
| miR-218-5p | *RBM47* | 0.157 | 0.012 |
| miR-532-5p | *GDPD5* | 0.157 | 0.012 |
| miR-637 | *FAM135A* | 0.157 | 0.012 |
| miR-362-5p | *FN1* | 0.157 | 0.012 |
| miR-96-5p | *ITGB2* | 0.157 | 0.012 |
| miR-186-5p | *ID2* | 0.157 | 0.012 |
| miR-181c-5p | *KAT2B* | 0.158 | 0.012 |
| miR-494-3p | *RAB5A* | 0.158 | 0.012 |
| miR-151a-3p | *RC3H1* | 0.158 | 0.012 |
| miR-494-3p | *SERPINB9* | 0.158 | 0.012 |
| miR-299-5p | *STAM* | 0.158 | 0.012 |
| miR-141-3p | *TMEM192* | 0.158 | 0.012 |
| miR-328-3p | *SERPINB9* | 0.158 | 0.012 |
| miR-1225-3p | *MLLT10* | 0.158 | 0.012 |
| miR-495-3p | *ZNF280D* | 0.158 | 0.012 |
| miR-532-5p | *RC3H1* | 0.159 | 0.011 |
| miR-605-5p | *IQGAP1* | 0.159 | 0.011 |
| miR-518c-3p | *MLLT10* | 0.159 | 0.011 |
| miR-381-3p | *ID2* | 0.159 | 0.011 |
| miR-502-5p | *MLLT10* | 0.160 | 0.011 |
| miR-328-3p | *RC3H1* | 0.160 | 0.011 |
| miR-187-3p | *LOXL1* | 0.160 | 0.010 |
| miR-542-3p | *ARHGAP29* | 0.160 | 0.010 |
| miR-543 | *STX7* | 0.160 | 0.010 |
| miR-181a-5p | *GLDN* | 0.161 | 0.010 |
| miR-452-5p | *RC3H1* | 0.161 | 0.010 |
| miR-138-5p | *MLLT10* | 0.161 | 0.010 |
| miR-186-5p | *STAM* | 0.161 | 0.010 |
| miR-562 | *RBM47* | 0.161 | 0.010 |
| miR-498 | *IQGAP1* | 0.161 | 0.010 |
| miR-494-3p | *RC3H1* | 0.161 | 0.010 |
| miR-27b-3p | *FN1* | 0.161 | 0.010 |
| miR-485-3p | *SERPINB9* | 0.161 | 0.010 |
| let-7e-5p | *TMEM192* | 0.162 | 0.009 |
| miR-432-5p | *ZNF280D* | 0.162 | 0.009 |
| miR-339-3p | *RAB5A* | 0.162 | 0.009 |
| miR-1184 | *MLLT10* | 0.163 | 0.009 |
| miR-612 | *SETDB1* | 0.163 | 0.009 |
| miR-491-5p | *TMEM43* | 0.163 | 0.009 |
| miR-148b-3p | *STX7* | 0.163 | 0.009 |
| miR-381-3p | *ARHGAP29* | 0.163 | 0.009 |
| miR-532-5p | *ZNF280D* | 0.163 | 0.009 |
| miR-503-5p | *SETDB1* | 0.164 | 0.009 |
| miR-767-5p | *IQGAP1* | 0.164 | 0.009 |
| miR-494-3p | *IQGAP1* | 0.164 | 0.008 |
| miR-519d-3p | *SRPK2* | 0.164 | 0.008 |
| miR-520d-3p | *HIPK3* | 0.164 | 0.008 |
| miR-643 | *SERPINB9* | 0.164 | 0.008 |
| miR-520b | *RBM47* | 0.164 | 0.008 |
| miR-621 | *RC3H1* | 0.164 | 0.008 |
| miR-186-5p | *FN1* | 0.165 | 0.008 |
| miR-643 | *STAM* | 0.165 | 0.008 |
| miR-643 | *STX7* | 0.165 | 0.008 |
| miR-1226-3p | *FAM135A* | 0.165 | 0.008 |
| let-7e-5p | *RC3H1* | 0.165 | 0.008 |
| miR-503-5p | *GDPD5* | 0.165 | 0.008 |
| miR-1269a | *MLLT10* | 0.165 | 0.008 |
| miR-96-5p | *SDCBP* | 0.166 | 0.008 |
| miR-495-3p | *SERPINB9* | 0.166 | 0.007 |
| miR-125b-5p | *RC3H1* | 0.166 | 0.007 |
| miR-26a-5p | *STX7* | 0.166 | 0.007 |
| miR-647 | *FAM135A* | 0.166 | 0.007 |
| miR-362-5p | *ZNF280D* | 0.166 | 0.007 |
| miR-23a-3p | *FN1* | 0.166 | 0.007 |
| miR-541-3p | *SERPINB9* | 0.166 | 0.007 |
| miR-374b-5p | *SDCBP* | 0.166 | 0.007 |
| miR-326 | *FN1* | 0.167 | 0.007 |
| miR-374b-5p | *RC3H1* | 0.167 | 0.007 |
| miR-921 | *RC3H1* | 0.167 | 0.007 |
| miR-421 | *RBM47* | 0.167 | 0.007 |
| miR-1293 | *FN1* | 0.167 | 0.007 |
| miR-1304-5p | *LOXL1* | 0.167 | 0.007 |
| let-7e-5p | *SERPINB9* | 0.168 | 0.007 |
| miR-641 | *TMEM43* | 0.168 | 0.007 |
| miR-649 | *SETDB1* | 0.168 | 0.007 |
| miR-146b-5p | *SDCBP* | 0.168 | 0.006 |
| miR-520c-3p | *RBM47* | 0.168 | 0.006 |
| miR-361-3p | *FN1* | 0.168 | 0.006 |
| miR-212-3p | *SDCBP* | 0.168 | 0.006 |
| miR-503-5p | *FAM135A* | 0.169 | 0.006 |
| miR-622 | *MLLT10* | 0.169 | 0.006 |
| miR-141-3p | *LOXL1* | 0.170 | 0.006 |
| miR-224-5p | *RC3H1* | 0.170 | 0.006 |
| miR-637 | *BANF1* | 0.170 | 0.006 |
| miR-26a-5p | *PYGL* | 0.170 | 0.006 |
| miR-222-3p | *ZNF280D* | 0.170 | 0.006 |
| miR-298 | *RBM47* | 0.170 | 0.006 |
| miR-409-5p | *MLLT10* | 0.170 | 0.006 |
| miR-595 | *FN1* | 0.170 | 0.006 |
| miR-1276 | *MLLT10* | 0.171 | 0.006 |
| miR-516b-5p | *RBM47* | 0.171 | 0.005 |
| miR-27b-3p | *RAB5A* | 0.171 | 0.005 |
| miR-637 | *SERPINB9* | 0.172 | 0.005 |
| miR-770-5p | *STXBP3* | 0.172 | 0.005 |
| miR-573 | *FN1* | 0.172 | 0.005 |
| miR-181a-5p | *KAT2B* | 0.172 | 0.005 |
| miR-199b-5p | *RAB5A* | 0.173 | 0.005 |
| miR-135b-5p | *RAB5A* | 0.173 | 0.005 |
| miR-641 | *STAM* | 0.173 | 0.005 |
| miR-429 | *IQGAP1* | 0.173 | 0.005 |
| miR-558 | *RC3H1* | 0.173 | 0.005 |
| miR-422a | *ARHGAP29* | 0.173 | 0.005 |
| miR-328-3p | *LOXL1* | 0.173 | 0.005 |
| miR-647 | *MLLT10* | 0.174 | 0.005 |
| miR-520d-3p | *MLLT10* | 0.174 | 0.004 |
| miR-450b-5p | *SDCBP* | 0.174 | 0.004 |
| miR-138-5p | *TMEM43* | 0.175 | 0.004 |
| miR-549a | *IQGAP1* | 0.175 | 0.004 |
| miR-409-3p | *RBM47* | 0.175 | 0.004 |
| miR-455-5p | *STAM* | 0.175 | 0.004 |
| miR-641 | *SRPK2* | 0.175 | 0.004 |
| miR-361-3p | *FAM135A* | 0.175 | 0.004 |
| miR-145-5p | *STAM* | 0.175 | 0.004 |
| miR-301a-3p | *SETDB1* | 0.175 | 0.004 |
| miR-330-3p | *ID2* | 0.176 | 0.004 |
| miR-491-5p | *FAM135A* | 0.176 | 0.004 |
| miR-186-5p | *RBM47* | 0.177 | 0.004 |
| miR-300 | *IQGAP1* | 0.177 | 0.004 |
| miR-573 | *STX7* | 0.177 | 0.004 |
| miR-298 | *RC3H1* | 0.177 | 0.004 |
| miR-210-3p | *FN1* | 0.177 | 0.004 |
| miR-181b-5p | *ZNF280D* | 0.178 | 0.004 |
| miR-643 | *ID2* | 0.178 | 0.004 |
| miR-491-5p | *GNAI1* | 0.178 | 0.003 |
| miR-342-5p | *FAM135A* | 0.178 | 0.003 |
| miR-498 | *RC3H1* | 0.178 | 0.003 |
| miR-298 | *ID2* | 0.178 | 0.003 |
| miR-644a | *ZNF280D* | 0.178 | 0.003 |
| miR-495-3p | *TMEM192* | 0.178 | 0.003 |
| miR-450b-5p | *ARHGAP29* | 0.179 | 0.003 |
| miR-452-5p | *ZNF280D* | 0.179 | 0.003 |
| miR-342-5p | *MLLT10* | 0.179 | 0.003 |
| miR-1184 | *STX7* | 0.179 | 0.003 |
| miR-191-5p | *IQGAP1* | 0.179 | 0.003 |
| miR-409-3p | *STAM* | 0.179 | 0.003 |
| miR-224-5p | *HIPK3* | 0.179 | 0.003 |
| miR-421 | *RC3H1* | 0.180 | 0.003 |
| miR-326 | *FAM135A* | 0.180 | 0.003 |
| miR-519d-3p | *FN1* | 0.180 | 0.003 |
| miR-30d-5p | *GNAI1* | 0.180 | 0.003 |
| miR-362-5p | *SETDB1* | 0.180 | 0.003 |
| miR-516b-5p | *ZNF280D* | 0.180 | 0.003 |
| miR-875-3p | *IQGAP1* | 0.180 | 0.003 |
| miR-30a-3p | *GLDN* | 0.180 | 0.003 |
| miR-200c-3p | *GLDN* | 0.181 | 0.003 |
| miR-543 | *HIPK3* | 0.181 | 0.003 |
| miR-141-3p | *SERPINB9* | 0.181 | 0.003 |
| miR-647 | *TMEM43* | 0.181 | 0.003 |
| miR-34b-5p | *TMEM192* | 0.182 | 0.003 |
| miR-583 | *CBX5* | 0.182 | 0.003 |
| miR-493-3p | *RBM47* | 0.182 | 0.003 |
| miR-485-5p | *LOXL1* | 0.182 | 0.003 |
| miR-372-3p | *FN1* | 0.182 | 0.003 |
| miR-431-5p | *TMEM192* | 0.183 | 0.003 |
| miR-495-3p | *ARHGAP29* | 0.183 | 0.002 |
| miR-200c-3p | *FN1* | 0.183 | 0.002 |
| miR-300 | *ARHGAP29* | 0.183 | 0.002 |
| miR-645 | *TMEM192* | 0.183 | 0.002 |
| miR-28-5p | *IQGAP1* | 0.183 | 0.002 |
| miR-580-3p | *CPB1* | 0.184 | 0.002 |
| miR-200c-3p | *TMEM43* | 0.184 | 0.002 |
| miR-532-5p | *TMEM192* | 0.184 | 0.002 |
| miR-622 | *STX7* | 0.184 | 0.002 |
| miR-181b-5p | *TMEM43* | 0.185 | 0.002 |
| miR-650 | *FAM135A* | 0.185 | 0.002 |
| miR-487b-3p | *STAM* | 0.185 | 0.002 |
| let-7e-5p | *CBX5* | 0.185 | 0.002 |
| miR-494-3p | *ARHGAP29* | 0.185 | 0.002 |
| miR-187-3p | *GLDN* | 0.185 | 0.002 |
| miR-30e-5p | *ID2* | 0.185 | 0.002 |
| miR-200a-3p | *IQGAP1* | 0.186 | 0.002 |
| miR-500a-3p | *IQGAP1* | 0.186 | 0.002 |
| miR-141-3p | *RC3H1* | 0.186 | 0.002 |
| miR-645 | *GDPD5* | 0.186 | 0.002 |
| miR-452-5p | *RBM47* | 0.186 | 0.002 |
| miR-186-5p | *SERPINB9* | 0.186 | 0.002 |
| miR-1243 | *HIPK3* | 0.186 | 0.002 |
| miR-645 | *HIPK3* | 0.187 | 0.002 |
| miR-637 | *STX7* | 0.187 | 0.002 |
| miR-1289 | *FAM135A* | 0.187 | 0.002 |
| miR-30b-5p | *STX7* | 0.187 | 0.002 |
| miR-95-3p | *IQGAP1* | 0.188 | 0.002 |
| miR-188-3p | *RBM47* | 0.188 | 0.002 |
| miR-301a-3p | *FAM135A* | 0.188 | 0.002 |
| miR-33a-5p | *RBM47* | 0.188 | 0.002 |
| miR-105-5p | *ARHGAP29* | 0.188 | 0.002 |
| miR-495-3p | *RBM47* | 0.188 | 0.002 |
| miR-330-5p | *BRD8* | 0.189 | 0.002 |
| miR-30e-5p | *TMEM192* | 0.189 | 0.002 |
| miR-646 | *RC3H1* | 0.189 | 0.002 |
| miR-542-5p | *RC3H1* | 0.189 | 0.002 |
| miR-30e-3p | *ZNF280D* | 0.189 | 0.002 |
| miR-224-5p | *STX7* | 0.189 | 0.002 |
| miR-148a-3p | *RAB5A* | 0.189 | 0.002 |
| miR-485-5p | *STAM* | 0.190 | 0.002 |
| miR-649 | *ARHGAP29* | 0.190 | 0.002 |
| miR-641 | *FN1* | 0.190 | 0.002 |
| miR-23b-3p | *FN1* | 0.190 | 0.002 |
| miR-300 | *RC3H1* | 0.190 | 0.002 |
| miR-199b-5p | *ARHGAP29* | 0.190 | 0.002 |
| miR-30b-5p | *HIPK3* | 0.191 | 0.001 |
| miR-27a-3p | *RC3H1* | 0.191 | 0.001 |
| miR-224-5p | *FAM135A* | 0.191 | 0.001 |
| miR-374b-5p | *RAB5A* | 0.192 | 0.001 |
| miR-616-3p | *RC3H1* | 0.192 | 0.001 |
| miR-153-3p | *TMEM192* | 0.192 | 0.001 |
| miR-372-3p | *HIPK3* | 0.192 | 0.001 |
| miR-298 | *CBX5* | 0.192 | 0.001 |
| miR-300 | *RBM47* | 0.193 | 0.001 |
| miR-520b | *FN1* | 0.193 | 0.001 |
| miR-605-5p | *ZNF280D* | 0.193 | 0.001 |
| miR-637 | *MLLT10* | 0.193 | 0.001 |
| miR-26a-5p | *RBM47* | 0.193 | 0.001 |
| miR-300 | *ID2* | 0.193 | 0.001 |
| miR-543 | *RAB5A* | 0.193 | 0.001 |
| miR-622 | *GDPD5* | 0.194 | 0.001 |
| miR-141-3p | *IQGAP1* | 0.194 | 0.001 |
| miR-298 | *MLLT10* | 0.194 | 0.001 |
| miR-300 | *BANF1* | 0.195 | 0.001 |
| miR-494-3p | *STAM* | 0.195 | 0.001 |
| miR-30d-5p | *ARHGAP29* | 0.196 | 0.001 |
| miR-200b-3p | *IQGAP1* | 0.196 | 0.001 |
| miR-34c-5p | *IQGAP1* | 0.196 | 0.001 |
| miR-455-5p | *RC3H1* | 0.196 | 0.001 |
| miR-26a-5p | *TMEM192* | 0.197 | 0.001 |
| miR-24-3p | *GNAI1* | 0.197 | 0.001 |
| miR-921 | *FAM135A* | 0.197 | 0.001 |
| miR-922 | *GDPD5* | 0.198 | 0.001 |
| miR-542-5p | *BANF1* | 0.198 | 0.001 |
| miR-876-5p | *FAM135A* | 0.198 | 0.001 |
| miR-543 | *RC3H1* | 0.198 | 0.001 |
| miR-485-5p | *RBM47* | 0.199 | 0.001 |
| miR-515-5p | *FN1* | 0.199 | 0.001 |
| miR-624-3p | *CPB1* | 0.199 | 0.001 |
| miR-574-5p | *RBM47* | 0.199 | 0.001 |
| miR-645 | *RBM47* | 0.200 | 0.001 |
| miR-455-3p | *ID2* | 0.200 | 0.001 |
| miR-548l | *RBM47* | 0.200 | 0.001 |
| miR-645 | *SERPINB9* | 0.200 | 0.001 |
| miR-573 | *RC3H1* | 0.201 | 0.001 |
| miR-543 | *ARFGEF2* | 0.201 | 0.001 |
| miR-146b-5p | *FN1* | 0.201 | 0.001 |
| miR-646 | *TMEM43* | 0.201 | 0.001 |
| miR-876-5p | *ITGB2* | 0.201 | 0.001 |
| miR-187-3p | *TMEM43* | 0.201 | 0.001 |
| miR-520e | *IQGAP1* | 0.202 | 0.001 |
| miR-224-5p | *IQGAP1* | 0.202 | 0.001 |
| miR-298 | *RAB5A* | 0.202 | 0.001 |
| miR-921 | *RAB5A* | 0.202 | 0.001 |
| miR-485-5p | *RC3H1* | 0.203 | 0.001 |
| miR-491-5p | *MLLT10* | 0.203 | 0.001 |
| miR-520b | *TMEM192* | 0.203 | 0.001 |
| miR-186-5p | *SDCBP* | 0.203 | 0.001 |
| miR-300 | *SERPINB9* | 0.203 | 0.001 |
| miR-186-5p | *RC3H1* | 0.204 | 0.001 |
| miR-500a-5p | *STX7* | 0.205 | 0.001 |
| miR-501-5p | *STX7* | 0.205 | 0.001 |
| miR-361-3p | *MLLT10* | 0.206 | 0.000 |
| miR-155-5p | *SDCBP* | 0.206 | 0.000 |
| miR-934 | *MLLT10* | 0.206 | 0.000 |
| miR-646 | *STXBP3* | 0.206 | 0.000 |
| miR-374b-5p | *IQGAP1* | 0.206 | 0.000 |
| miR-301a-3p | *MLLT10* | 0.206 | 0.000 |
| miR-634 | *ZNF280D* | 0.207 | 0.000 |
| miR-485-5p | *IQGAP1* | 0.208 | 0.000 |
| miR-30d-5p | *STX7* | 0.208 | 0.000 |
| miR-493-3p | *TMEM192* | 0.208 | 0.000 |
| miR-520d-3p | *RBM47* | 0.209 | 0.000 |
| miR-1304-5p | *STAM* | 0.209 | 0.000 |
| miR-541-3p | *GDPD5* | 0.209 | 0.000 |
| miR-330-3p | *SRPK2* | 0.209 | 0.000 |
| miR-628-5p | *IQGAP1* | 0.210 | 0.000 |
| miR-187-3p | *HIPK3* | 0.210 | 0.000 |
| miR-543 | *IQGAP1* | 0.210 | 0.000 |
| miR-641 | *FAM135A* | 0.211 | 0.000 |
| miR-33a-5p | *ARHGAP29* | 0.211 | 0.000 |
| miR-876-3p | *RBM47* | 0.211 | 0.000 |
| miR-485-5p | *SERPINB9* | 0.211 | 0.000 |
| miR-31-5p | *BRD8* | 0.211 | 0.000 |
| miR-26a-5p | *ARHGAP29* | 0.211 | 0.000 |
| miR-503-5p | *ZNF280D* | 0.211 | 0.000 |
| miR-181b-5p | *FAM135A* | 0.212 | 0.000 |
| miR-199b-5p | *RBM47* | 0.212 | 0.000 |
| miR-148b-3p | *RC3H1* | 0.212 | 0.000 |
| miR-769-5p | *ZNF280D* | 0.212 | 0.000 |
| miR-616-3p | *IQGAP1* | 0.214 | 0.000 |
| miR-1225-3p | *RAB5A* | 0.214 | 0.000 |
| miR-646 | *RBM47* | 0.214 | 0.000 |
| miR-520d-3p | *IQGAP1* | 0.214 | 0.000 |
| miR-649 | *SRPK2* | 0.214 | 0.000 |
| miR-27a-3p | *RAB5A* | 0.214 | 0.000 |
| miR-421 | *IQGAP1* | 0.214 | 0.000 |
| miR-1271-5p | *ARHGAP29* | 0.215 | 0.000 |
| miR-650 | *MLLT10* | 0.215 | 0.000 |
| miR-362-5p | *MLLT10* | 0.215 | 0.000 |
| miR-770-5p | *SDCBP* | 0.216 | 0.000 |
| miR-641 | *SERPINB9* | 0.216 | 0.000 |
| miR-502-5p | *STX7* | 0.216 | 0.000 |
| miR-146b-5p | *IQGAP1* | 0.216 | 0.000 |
| let-7e-5p | *SPECC1L* | 0.216 | 0.000 |
| miR-30e-5p | *RC3H1* | 0.217 | 0.000 |
| miR-543 | *ARHGAP29* | 0.217 | 0.000 |
| miR-632 | *SETDB1* | 0.217 | 0.000 |
| miR-876-5p | *GNAI1* | 0.217 | 0.000 |
| miR-649 | *STAM* | 0.217 | 0.000 |
| miR-149-5p | *SETDB1* | 0.217 | 0.000 |
| miR-543 | *ZNF280D* | 0.218 | 0.000 |
| miR-876-5p | *MLLT10* | 0.218 | 0.000 |
| miR-1184 | *SDCBP* | 0.218 | 0.000 |
| miR-663b | *BRD8* | 0.218 | 0.000 |
| miR-26a-5p | *RC3H1* | 0.218 | 0.000 |
| miR-595 | *RC3H1* | 0.219 | 0.000 |
| miR-548l | *LOXL1* | 0.219 | 0.000 |
| miR-543 | *SERPINB9* | 0.219 | 0.000 |
| let-7e-5p | *IQGAP1* | 0.220 | 0.000 |
| miR-362-5p | *TMEM43* | 0.220 | 0.000 |
| miR-543 | *RBM47* | 0.220 | 0.000 |
| miR-1226-3p | *MLLT10* | 0.220 | 0.000 |
| miR-500a-5p | *SERPINB9* | 0.220 | 0.000 |
| miR-494-3p | *RBM47* | 0.220 | 0.000 |
| miR-301a-3p | *GNAI1* | 0.220 | 0.000 |
| miR-452-3p | *FN1* | 0.221 | 0.000 |
| miR-646 | *HIPK3* | 0.221 | 0.000 |
| miR-605-5p | *RBM47* | 0.221 | 0.000 |
| miR-31-5p | *RC3H1* | 0.221 | 0.000 |
| miR-328-3p | *IQGAP1* | 0.221 | 0.000 |
| miR-193b-3p | *FN1* | 0.223 | 0.000 |
| miR-520c-3p | *FN1* | 0.224 | 0.000 |
| miR-187-3p | *GDPD5* | 0.224 | 0.000 |
| miR-31-5p | *RAB5A* | 0.225 | 0.000 |
| miR-501-5p | *CBX5* | 0.225 | 0.000 |
| miR-181b-5p | *SRPK2* | 0.225 | 0.000 |
| miR-30e-3p | *TMEM43* | 0.226 | 0.000 |
| miR-224-5p | *ZNF280D* | 0.227 | 0.000 |
| miR-641 | *HIPK3* | 0.228 | 0.000 |
| miR-520d-3p | *RAB5A* | 0.228 | 0.000 |
| miR-542-5p | *IQGAP1* | 0.229 | 0.000 |
| miR-876-5p | *RC3H1* | 0.229 | 0.000 |
| miR-600 | *RC3H1* | 0.230 | 0.000 |
| miR-24-3p | *ARHGAP29* | 0.230 | 0.000 |
| miR-583 | *ARHGAP29* | 0.230 | 0.000 |
| miR-181c-5p | *ZNF280D* | 0.232 | 0.000 |
| miR-631 | *SETDB1* | 0.232 | 0.000 |
| miR-30a-3p | *TMEM43* | 0.232 | 0.000 |
| miR-491-5p | *ARHGAP29* | 0.233 | 0.000 |
| miR-503-5p | *LOXL1* | 0.234 | 0.000 |
| miR-621 | *RAB5A* | 0.234 | 0.000 |
| miR-188-5p | *HBB* | 0.234 | 0.000 |
| miR-541-3p | *ARHGAP29* | 0.234 | 0.000 |
| miR-139-5p | *FN1* | 0.234 | 0.000 |
| miR-330-3p | *TMEM43* | 0.235 | 0.000 |
| miR-455-3p | *HIPK3* | 0.235 | 0.000 |
| miR-372-3p | *ARHGAP29* | 0.235 | 0.000 |
| miR-668-3p | *STAM* | 0.235 | 0.000 |
| miR-605-5p | *CBX5* | 0.235 | 0.000 |
| miR-650 | *GDPD5* | 0.236 | 0.000 |
| miR-501-5p | *RBM47* | 0.236 | 0.000 |
| miR-330-3p | *SDCBP* | 0.237 | 0.000 |
| miR-500a-5p | *RC3H1* | 0.237 | 0.000 |
| miR-141-3p | *RAB5A* | 0.237 | 0.000 |
| miR-637 | *IQGAP1* | 0.237 | 0.000 |
| miR-630 | *SRPK2* | 0.237 | 0.000 |
| miR-330-3p | *STXBP3* | 0.238 | 0.000 |
| miR-519b-3p | *ARHGAP29* | 0.239 | 0.000 |
| miR-516b-5p | *RC3H1* | 0.239 | 0.000 |
| miR-485-5p | *ITGB2* | 0.239 | 0.000 |
| miR-181a-5p | *ZNF280D* | 0.240 | 0.000 |
| miR-181b-5p | *GNAI1* | 0.240 | 0.000 |
| miR-493-5p | *RBM47* | 0.241 | 0.000 |
| miR-200c-3p | *RBM47* | 0.241 | 0.000 |
| miR-1200 | *SETDB1* | 0.241 | 0.000 |
| miR-501-5p | *RC3H1* | 0.242 | 0.000 |
| miR-30e-5p | *IQGAP1* | 0.242 | 0.000 |
| miR-24-3p | *GDPD5* | 0.242 | 0.000 |
| miR-595 | *RBM47* | 0.242 | 0.000 |
| miR-30d-5p | *TMEM192* | 0.242 | 0.000 |
| miR-330-5p | *TMEM43* | 0.243 | 0.000 |
| miR-200c-3p | *FAM135A* | 0.243 | 0.000 |
| miR-500a-5p | *IQGAP1* | 0.244 | 0.000 |
| miR-301a-3p | *STX7* | 0.245 | 0.000 |
| miR-1226-3p | *RBM47* | 0.245 | 0.000 |
| miR-501-5p | *IQGAP1* | 0.245 | 0.000 |
| miR-30a-5p | *GNAI1* | 0.247 | 0.000 |
| miR-181d-5p | *ZNF280D* | 0.247 | 0.000 |
| miR-196b-5p | *FAM135A* | 0.248 | 0.000 |
| miR-502-5p | *RC3H1* | 0.248 | 0.000 |
| miR-409-5p | *SDCBP* | 0.248 | 0.000 |
| miR-330-3p | *SETDB1* | 0.248 | 0.000 |
| miR-595 | *SERPINB9* | 0.249 | 0.000 |
| miR-339-5p | *ARHGAP29* | 0.249 | 0.000 |
| miR-647 | *TMEM192* | 0.249 | 0.000 |
| miR-643 | *IQGAP1* | 0.249 | 0.000 |
| miR-573 | *SERPINB9* | 0.249 | 0.000 |
| miR-766-3p | *FN1* | 0.250 | 0.000 |
| miR-630 | *STXBP3* | 0.250 | 0.000 |
| miR-876-5p | *HIPK3* | 0.251 | 0.000 |
| miR-186-5p | *IQGAP1* | 0.251 | 0.000 |
| miR-24-3p | *STX7* | 0.253 | 0.000 |
| miR-30b-5p | *TMEM192* | 0.253 | 0.000 |
| miR-30d-5p | *IQGAP1* | 0.254 | 0.000 |
| miR-455-3p | *ARHGAP29* | 0.254 | 0.000 |
| miR-1304-5p | *GNAI1* | 0.255 | 0.000 |
| miR-181b-5p | *MLLT10* | 0.255 | 0.000 |
| miR-519d-3p | *MLLT10* | 0.255 | 0.000 |
| miR-644a | *MLLT10* | 0.255 | 0.000 |
| miR-1184 | *IQGAP1* | 0.256 | 0.000 |
| miR-519d-3p | *STX7* | 0.256 | 0.000 |
| miR-644a | *GNAI1* | 0.256 | 0.000 |
| miR-330-3p | *RC3H1* | 0.257 | 0.000 |
| miR-520d-3p | *RC3H1* | 0.259 | 0.000 |
| miR-30d-5p | *RC3H1* | 0.260 | 0.000 |
| miR-491-5p | *SERPINB9* | 0.260 | 0.000 |
| miR-24-3p | *CBX5* | 0.260 | 0.000 |
| miR-523-3p | *GDPD5* | 0.261 | 0.000 |
| miR-616-3p | *RAB5A* | 0.261 | 0.000 |
| miR-632 | *TMEM43* | 0.261 | 0.000 |
| miR-30e-3p | *MLLT10* | 0.261 | 0.000 |
| miR-186-5p | *RAB5A* | 0.262 | 0.000 |
| miR-200c-3p | *MLLT10* | 0.262 | 0.000 |
| miR-125a-5p | *FN1* | 0.263 | 0.000 |
| miR-634 | *TMEM43* | 0.263 | 0.000 |
| miR-24-3p | *LOXL1* | 0.263 | 0.000 |
| miR-708-5p | *IQGAP1* | 0.264 | 0.000 |
| miR-770-5p | *GDPD5* | 0.265 | 0.000 |
| miR-455-5p | *IQGAP1* | 0.265 | 0.000 |
| miR-342-5p | *LOXL1* | 0.266 | 0.000 |
| miR-554 | *SETDB1* | 0.267 | 0.000 |
| miR-409-5p | *RC3H1* | 0.267 | 0.000 |
| miR-181b-5p | *STX7* | 0.267 | 0.000 |
| miR-181d-5p | *SRPK2* | 0.268 | 0.000 |
| miR-30c-5p | *GNAI1* | 0.269 | 0.000 |
| miR-181c-5p | *SRPK2* | 0.269 | 0.000 |
| miR-631 | *STAM* | 0.271 | 0.000 |
| miR-500a-5p | *RBM47* | 0.271 | 0.000 |
| miR-643 | *RAB5A* | 0.271 | 0.000 |
| miR-1293 | *RC3H1* | 0.272 | 0.000 |
| miR-27a-3p | *FN1* | 0.272 | 0.000 |
| miR-766-3p | *MLLT10* | 0.273 | 0.000 |
| miR-30a-3p | *GNAI1* | 0.273 | 0.000 |
| miR-200c-3p | *LOXL1* | 0.274 | 0.000 |
| miR-301a-3p | *HIPK3* | 0.276 | 0.000 |
| miR-649 | *STX7* | 0.276 | 0.000 |
| miR-641 | *STX7* | 0.276 | 0.000 |
| miR-641 | *RC3H1* | 0.276 | 0.000 |
| miR-330-5p | *FAM135A* | 0.276 | 0.000 |
| miR-181d-5p | *BRD8* | 0.277 | 0.000 |
| miR-1304-5p | *SDCBP* | 0.278 | 0.000 |
| miR-668-3p | *MLLT10* | 0.278 | 0.000 |
| miR-455-3p | *RC3H1* | 0.279 | 0.000 |
| miR-1200 | *GNAI1* | 0.279 | 0.000 |
| miR-769-5p | *RC3H1* | 0.279 | 0.000 |
| miR-330-3p | *ZNF280D* | 0.280 | 0.000 |
| miR-342-5p | *CBX5* | 0.280 | 0.000 |
| miR-296-5p | *GDPD5* | 0.281 | 0.000 |
| miR-515-5p | *RBM47* | 0.281 | 0.000 |
| miR-1303 | *SRPK2* | 0.281 | 0.000 |
| miR-96-5p | *FN1* | 0.281 | 0.000 |
| miR-664a-3p | *ZNF280D* | 0.281 | 0.000 |
| miR-1184 | *RBM47* | 0.282 | 0.000 |
| miR-181d-5p | *FAM135A* | 0.282 | 0.000 |
| miR-30a-5p | *STX7* | 0.282 | 0.000 |
| miR-630 | *GNAI1* | 0.283 | 0.000 |
| miR-330-3p | *MLLT10* | 0.284 | 0.000 |
| miR-518c-3p | *ID2* | 0.284 | 0.000 |
| miR-612 | *LOXL1* | 0.284 | 0.000 |
| miR-634 | *GNAI1* | 0.287 | 0.000 |
| miR-520c-3p | *ARHGAP29* | 0.288 | 0.000 |
| miR-520b | *ARHGAP29* | 0.288 | 0.000 |
| miR-361-3p | *RC3H1* | 0.290 | 0.000 |
| miR-30a-3p | *MLLT10* | 0.291 | 0.000 |
| miR-196b-5p | *STAM* | 0.291 | 0.000 |
| miR-519d-3p | *SDCBP* | 0.292 | 0.000 |
| miR-339-5p | *LOXL1* | 0.292 | 0.000 |
| miR-1289 | *GDPD5* | 0.293 | 0.000 |
| miR-541-3p | *ID2* | 0.293 | 0.000 |
| miR-24-3p | *SERPINB9* | 0.293 | 0.000 |
| miR-181c-5p | *FAM135A* | 0.294 | 0.000 |
| miR-30b-5p | *IQGAP1* | 0.295 | 0.000 |
| miR-30b-5p | *RC3H1* | 0.295 | 0.000 |
| miR-491-5p | *RBM47* | 0.297 | 0.000 |
| miR-766-3p | *STX7* | 0.298 | 0.000 |
| miR-330-3p | *LOXL1* | 0.300 | 0.000 |
| miR-30a-3p | *ZNF280D* | 0.300 | 0.000 |
| miR-503-5p | *SERPINB9* | 0.301 | 0.000 |
| miR-520e | *ARHGAP29* | 0.302 | 0.000 |
| miR-601 | *RC3H1* | 0.302 | 0.000 |
| miR-181c-5p | *ARFGEF2* | 0.303 | 0.000 |
| miR-515-5p | *RC3H1* | 0.303 | 0.000 |
| miR-340-3p | *ARHGAP29* | 0.304 | 0.000 |
| miR-330-3p | *STX7* | 0.305 | 0.000 |
| miR-181d-5p | *GNAI1* | 0.306 | 0.000 |
| miR-361-3p | *RBM47* | 0.307 | 0.000 |
| miR-634 | *FAM135A* | 0.307 | 0.000 |
| miR-766-3p | *SERPINB9* | 0.308 | 0.000 |
| miR-1303 | *GNAI1* | 0.308 | 0.000 |
| miR-181a-5p | *SRPK2* | 0.309 | 0.000 |
| miR-770-5p | *RBM47* | 0.310 | 0.000 |
| miR-634 | *MLLT10* | 0.312 | 0.000 |
| miR-24-3p | *RC3H1* | 0.312 | 0.000 |
| miR-1200 | *MLLT10* | 0.313 | 0.000 |
| miR-452-3p | *LOXL1* | 0.314 | 0.000 |
| miR-635 | *TMEM43* | 0.314 | 0.000 |
| miR-200c-3p | *RC3H1* | 0.314 | 0.000 |
| miR-375 | *FN1* | 0.316 | 0.000 |
| miR-766-3p | *RC3H1* | 0.317 | 0.000 |
| miR-196b-5p | *MLLT10* | 0.318 | 0.000 |
| miR-181a-5p | *FAM135A* | 0.320 | 0.000 |
| miR-362-5p | *SDCBP* | 0.321 | 0.000 |
| miR-1292-5p | *HIPK3* | 0.321 | 0.000 |
| miR-1291 | *LOXL1* | 0.322 | 0.000 |
| miR-515-5p | *IQGAP1* | 0.325 | 0.000 |
| miR-139-5p | *GNAI1* | 0.325 | 0.000 |
| miR-1304-5p | *RC3H1* | 0.326 | 0.000 |
| miR-30c-5p | *STX7* | 0.327 | 0.000 |
| miR-455-3p | *RAB5A* | 0.327 | 0.000 |
| miR-1303 | *FAM135A* | 0.329 | 0.000 |
| miR-24-3p | *IQGAP1* | 0.329 | 0.000 |
| miR-1291 | *GDPD5* | 0.329 | 0.000 |
| miR-181c-5p | *GNAI1* | 0.329 | 0.000 |
| miR-1244 | *FAM135A* | 0.330 | 0.000 |
| miR-30e-3p | *ARHGAP29* | 0.330 | 0.000 |
| miR-766-3p | *GDPD5* | 0.331 | 0.000 |
| miR-30a-3p | *RBM47* | 0.332 | 0.000 |
| miR-181d-5p | *STX7* | 0.333 | 0.000 |
| miR-181b-5p | *RBM47* | 0.333 | 0.000 |
| miR-668-3p | *RC3H1* | 0.334 | 0.000 |
| miR-30b-5p | *ARHGAP29* | 0.334 | 0.000 |
| miR-181b-5p | *RC3H1* | 0.334 | 0.000 |
| miR-330-5p | *RC3H1* | 0.336 | 0.000 |
| miR-301a-3p | *RC3H1* | 0.337 | 0.000 |
| miR-649 | *RC3H1* | 0.338 | 0.000 |
| miR-330-3p | *RBM47* | 0.338 | 0.000 |
| miR-612 | *GDPD5* | 0.340 | 0.000 |
| miR-326 | *RC3H1* | 0.340 | 0.000 |
| miR-330-3p | *CBX5* | 0.340 | 0.000 |
| miR-1273a | *SDCBP* | 0.341 | 0.000 |
| miR-149-5p | *RBM47* | 0.341 | 0.000 |
| miR-149-5p | *SDCBP* | 0.341 | 0.000 |
| miR-455-3p | *SERPINB9* | 0.342 | 0.000 |
| miR-631 | *TMEM43* | 0.343 | 0.000 |
| miR-769-5p | *TMEM192* | 0.345 | 0.000 |
| miR-196b-5p | *SDCBP* | 0.345 | 0.000 |
| miR-181b-5p | *ARFGEF2* | 0.345 | 0.000 |
| miR-181d-5p | *MLLT10* | 0.346 | 0.000 |
| miR-181c-5p | *MLLT10* | 0.346 | 0.000 |
| miR-630 | *STX7* | 0.347 | 0.000 |
| miR-664a-3p | *GNAI1* | 0.348 | 0.000 |
| miR-1304-5p | *MLLT10* | 0.348 | 0.000 |
| miR-326 | *RBM47* | 0.349 | 0.000 |
| miR-326 | *TMEM192* | 0.353 | 0.000 |
| miR-139-5p | *MLLT10* | 0.355 | 0.000 |
| miR-181a-5p | *GNAI1* | 0.355 | 0.000 |
| miR-340-3p | *ID2* | 0.355 | 0.000 |
| miR-934 | *RBM47* | 0.357 | 0.000 |
| miR-362-5p | *RBM47* | 0.357 | 0.000 |
| miR-1228-3p | *GDPD5* | 0.358 | 0.000 |
| miR-644a | *SERPINB9* | 0.359 | 0.000 |
| miR-641 | *IQGAP1* | 0.359 | 0.000 |
| miR-361-3p | *CBX5* | 0.360 | 0.000 |
| miR-362-5p | *RC3H1* | 0.360 | 0.000 |
| miR-30c-5p | *HIPK3* | 0.360 | 0.000 |
| miR-601 | *SERPINB9* | 0.363 | 0.000 |
| miR-181c-5p | *STX7* | 0.363 | 0.000 |
| miR-296-5p | *LOXL1* | 0.364 | 0.000 |
| miR-1244 | *STAM* | 0.365 | 0.000 |
| miR-125a-5p | *LOXL1* | 0.365 | 0.000 |
| miR-30a-5p | *RC3H1* | 0.365 | 0.000 |
| miR-181b-5p | *ARHGAP29* | 0.365 | 0.000 |
| miR-30e-3p | *RBM47* | 0.366 | 0.000 |
| miR-491-5p | *CBX5* | 0.367 | 0.000 |
| miR-551b-3p | *IQGAP1* | 0.368 | 0.000 |
| miR-200c-3p | *IQGAP1* | 0.369 | 0.000 |
| miR-668-3p | *RBM47* | 0.370 | 0.000 |
| miR-181b-5p | *SERPINB9* | 0.370 | 0.000 |
| miR-1229-3p | *RC3H1* | 0.372 | 0.000 |
| miR-181c-5p | *RC3H1* | 0.372 | 0.000 |
| miR-1244 | *STXBP3* | 0.373 | 0.000 |
| miR-632 | *SERPINB9* | 0.374 | 0.000 |
| miR-632 | *RC3H1* | 0.374 | 0.000 |
| miR-200c-3p | *RAB5A* | 0.374 | 0.000 |
| miR-139-5p | *STX7* | 0.375 | 0.000 |
| miR-30a-5p | *ID2* | 0.376 | 0.000 |
| miR-362-5p | *IQGAP1* | 0.377 | 0.000 |
| miR-554 | *ARHGAP29* | 0.378 | 0.000 |
| miR-30a-3p | *ARHGAP29* | 0.379 | 0.000 |
| miR-519d-3p | *RC3H1* | 0.380 | 0.000 |
| miR-520d-3p | *ARHGAP29* | 0.381 | 0.000 |
| miR-335-5p | *ARHGAP29* | 0.381 | 0.000 |
| miR-30c-5p | *ARHGAP29* | 0.381 | 0.000 |
| miR-181c-5p | *ARHGAP29* | 0.381 | 0.000 |
| miR-1228-3p | *STX7* | 0.382 | 0.000 |
| miR-1301-3p | *MLLT10* | 0.382 | 0.000 |
| miR-181a-5p | *MLLT10* | 0.382 | 0.000 |
| miR-30a-5p | *TMEM192* | 0.385 | 0.000 |
| miR-554 | *MLLT10* | 0.387 | 0.000 |
| miR-663b | *MLLT10* | 0.387 | 0.000 |
| miR-301a-3p | *RAB5A* | 0.388 | 0.000 |
| miR-30a-5p | *ARHGAP29* | 0.389 | 0.000 |
| miR-649 | *IQGAP1* | 0.390 | 0.000 |
| miR-668-3p | *IQGAP1* | 0.395 | 0.000 |
| miR-30a-5p | *IQGAP1* | 0.396 | 0.000 |
| miR-1303 | *MLLT10* | 0.396 | 0.000 |
| miR-330-3p | *ARFGEF2* | 0.398 | 0.000 |
| miR-668-3p | *SERPINB9* | 0.398 | 0.000 |
| miR-1244 | *MLLT10* | 0.400 | 0.000 |
| miR-181c-5p | *RBM47* | 0.401 | 0.000 |
| miR-181c-5p | *SERPINB9* | 0.402 | 0.000 |
| miR-181a-5p | *STX7* | 0.402 | 0.000 |
| miR-181a-5p | *ARFGEF2* | 0.404 | 0.000 |
| miR-1303 | *RC3H1* | 0.404 | 0.000 |
| miR-649 | *RAB5A* | 0.405 | 0.000 |
| miR-181a-5p | *ARHGAP29* | 0.407 | 0.000 |
| miR-330-5p | *TMEM192* | 0.407 | 0.000 |
| miR-612 | *SERPINB9* | 0.408 | 0.000 |
| miR-193a-3p | *FN1* | 0.408 | 0.000 |
| miR-339-5p | *IQGAP1* | 0.408 | 0.000 |
| miR-631 | *LOXL1* | 0.409 | 0.000 |
| miR-612 | *RC3H1* | 0.410 | 0.000 |
| miR-181d-5p | *RC3H1* | 0.410 | 0.000 |
| miR-330-5p | *RBM47* | 0.414 | 0.000 |
| miR-455-3p | *IQGAP1* | 0.418 | 0.000 |
| miR-644a | *RAB5A* | 0.418 | 0.000 |
| miR-1228-3p | *RBM47* | 0.419 | 0.000 |
| miR-361-3p | *ITGB2* | 0.425 | 0.000 |
| miR-491-5p | *IQGAP1* | 0.427 | 0.000 |
| miR-181d-5p | *RBM47* | 0.431 | 0.000 |
| miR-181d-5p | *ARFGEF2* | 0.432 | 0.000 |
| miR-1236-3p | *RBM47* | 0.433 | 0.000 |
| miR-422a | *HBB* | 0.434 | 0.000 |
| miR-934 | *ARHGAP29* | 0.442 | 0.000 |
| miR-181d-5p | *SERPINB9* | 0.442 | 0.000 |
| miR-1301-3p | *HIPK3* | 0.449 | 0.000 |
| miR-30c-5p | *TMEM192* | 0.454 | 0.000 |
| miR-1301-3p | *RBM47* | 0.454 | 0.000 |
| miR-630 | *CBX5* | 0.459 | 0.000 |
| miR-139-5p | *RBM47* | 0.460 | 0.000 |
| miR-139-5p | *TMEM192* | 0.464 | 0.000 |
| miR-1236-3p | *RAB5A* | 0.466 | 0.000 |
| miR-181a-5p | *RBM47* | 0.469 | 0.000 |
| miR-181d-5p | *ARHGAP29* | 0.472 | 0.000 |
| miR-30c-5p | *RC3H1* | 0.474 | 0.000 |
| miR-296-5p | *HBA2* | 0.474 | 0.000 |
| miR-449a | *HBG2* | 0.479 | 0.000 |
| miR-125a-5p | *RC3H1* | 0.480 | 0.000 |
| miR-139-5p | *RAB5A* | 0.494 | 0.000 |
| miR-181a-5p | *RC3H1* | 0.495 | 0.000 |
| miR-181b-5p | *IQGAP1* | 0.497 | 0.000 |
| miR-193a-5p | *FN1* | 0.504 | 0.000 |
| miR-181c-5p | *IQGAP1* | 0.507 | 0.000 |
| miR-554 | *GDPD5* | 0.509 | 0.000 |
| miR-181a-5p | *SERPINB9* | 0.513 | 0.000 |
| miR-664a-3p | *RC3H1* | 0.515 | 0.000 |
| miR-196b-5p | *IQGAP1* | 0.515 | 0.000 |
| miR-125a-5p | *IQGAP1* | 0.517 | 0.000 |
| miR-30c-5p | *IQGAP1* | 0.520 | 0.000 |
| miR-635 | *LOXL1* | 0.536 | 0.000 |
| miR-631 | *RC3H1* | 0.542 | 0.000 |
| miR-635 | *RBM47* | 0.560 | 0.000 |
| miR-554 | *CBX5* | 0.569 | 0.000 |
| miR-502-5p | *HBG2* | 0.587 | 0.000 |
| miR-181a-5p | *IQGAP1* | 0.595 | 0.000 |
| miR-1244 | *SDCBP* | 0.601 | 0.000 |
| miR-181d-5p | *IQGAP1* | 0.608 | 0.000 |
| miR-339-5p | *HBG2* | 0.626 | 0.000 |
| miR-635 | *SERPINB9* | 0.634 | 0.000 |
| miR-362-5p | *HBG2* | 0.722 | 0.000 |
| miR-1244 | *IQGAP1* | 0.744 | 0.000 |
